# Supplementary material
Source: Springer Nature journal article supplement (https://www.springermedizin.de/resource/supplementary/13075_2004_1577_MOESM1_ESM.pdf/9690090)

Cit-CII

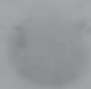

Cit-RSA

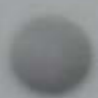

CII

RSA

Supplement: MOESM1 [file 9690090]
